# Supplementary material for: Does community-based health insurance protect women from financial catastrophe after cesarean section? A prospective study from a rural hospital in Rwanda
Source: Springer Nature journal article supplement (doi:10.1186/s12913-022-08101-3), 2022-05-31
Supplement: MOESM1 [file 23112608]

# Financial Risk Protection Survey

Patient study identification number \_\_\_\_\_

What is the size of your household, including yourself and new infant? (how many members normally live in your house) \_\_\_\_\_

What occupation is held by the person who makes the most money in your household (primary breadwinner)?

- Student
- Farmer
- Employed (Government / NGO / Private company)
- Self-employed
- House-wife
- Other
- Unskilled labor (non-agricultural)

If other, what? \_\_\_\_\_

How much does your household earn in an average month? \_\_\_\_\_

How much money does your household spend on food (including oil, salt, sugar, cooking petrol) and water, juice or soda to drink per month? \_\_\_\_\_

How much money does your household spend on livestock (cows, pigs, goats, chickens etc.) every month? [if not known please indicate yearly expenditure] \_\_\_\_\_

How much money does your household spend on transport per month? \_\_\_\_\_

How much does your household pay for your house/apartment in rent or mortgage or housing fees per month (if applicable)? \_\_\_\_\_

How much money does your household spend on other household items such as clothes, improvements to your house etc per month? [if not known, estimate per year] \_\_\_\_\_

How much money does your household spend on education per term for all the children you support, including school fees and books? \_\_\_\_\_

Do you have other regular expenditures?  Yes  No

If so what are they and how often do you pay them? \_\_\_\_\_

How much are these other expenditures? \_\_\_\_\_

Excluding this hospital course, how much money does your household usually spend on health care, including medicines, fees for doctors or hospital visits, fees for traditional healers per year? \_\_\_\_\_

---

---

## Hospitalization Associated Expenditures

How many days were you in the hospital?

- 1  
 2  
 3  
 4  
 5  
 6  
 7 or more

How much did you pay each day you were in the hospital?

---

How much money in total did your household spend for (all)/the attendant(s) to come to the hospital to bring food or look after the patient?

---

Did you have to pay any fees or make any informal payments directly to healthcare workers or hospital employees for your surgery or hospitalization?

- Yes  
 No

If yes, how much did you pay?

---

Did your household pay anyone else to act as an attendant and take care of the patient during this hospitalization?

- Yes  
 No

Did your household have to borrow money to pay for this hospitalization?

- Yes  
 No

If yes, how much?

---

Did your household have to sell land or possessions (including livestock) to pay for this hospitalization?

- Yes  
 No

Did your household have to permanently stop sending children to school, or did you pay reduced school fees in order to pay for this hospitalization?

- Yes  
 No

What amount did your household spend on food during the hospitalization?

---

What amount in wages has your household lost due to this hospitalization? (ie. calculate based on how many people have missed work and for how many days and their daily wage)

---

Did you or anyone in your household permanently lose a job as a result of this hospitalization?

- Yes  
 No

How much did you receive in outside funds from charity or from the social worker/hospital fund to pay for your hospitalization for all goods and services?

---

---

---

### Hospital Expenses

Hospital electronic ID \_\_\_\_\_

How much money did the patient spend on this hospitalization? \_\_\_\_\_

How much money did you spend on medications & other consumables? (from hospital records) \_\_\_\_\_

How much money did your household spend on laboratory tests? (from hospital records) \_\_\_\_\_

How much money did you spend on procedures, bandages and dressing supplies? (from hospital records) \_\_\_\_\_

How much money did your household spend on imaging and x-ray? (from hospital records) \_\_\_\_\_

How much money did your household spend on any other medical supplies? (from hospital records) \_\_\_\_\_

How much did you spend on ambulance fees? \_\_\_\_\_

Did you have to pay any other fees to the hospital besides those we have already mentioned?  Yes  No

If yes, how much? \_\_\_\_\_
